# Supplementary material
Source: Springer Nature journal article supplement (https://www.springermedizin.de/resource/supplementary/12936_2010_1786_MOESM7_ESM.pdf/9541708)

**Boane**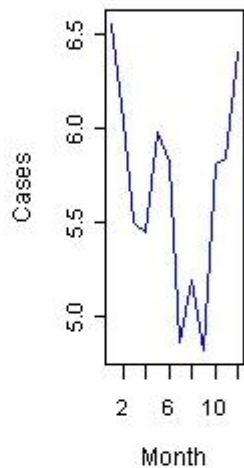**Magude**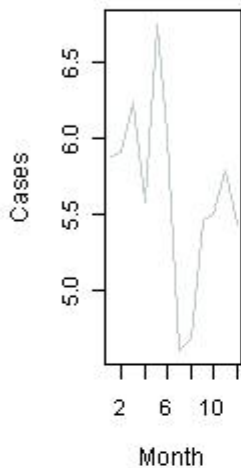**Manhica**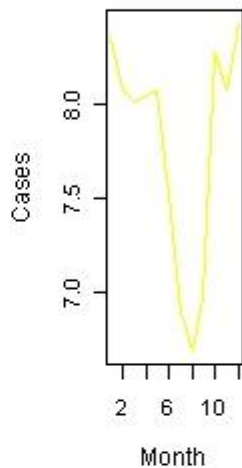**Moamba**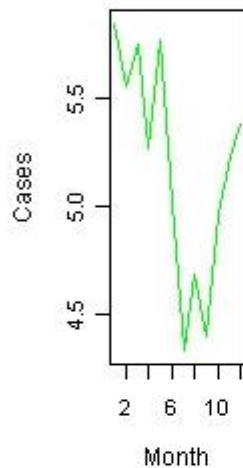**Marracuene**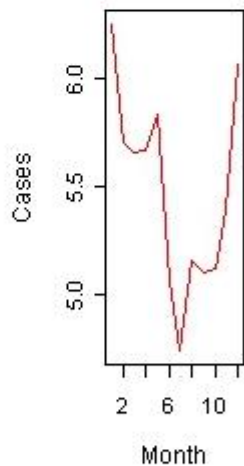**Matola**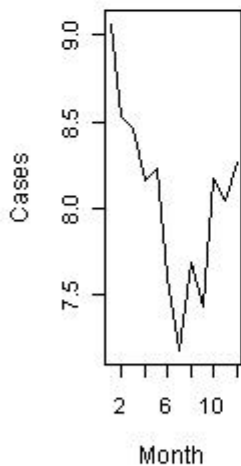**Matutuine**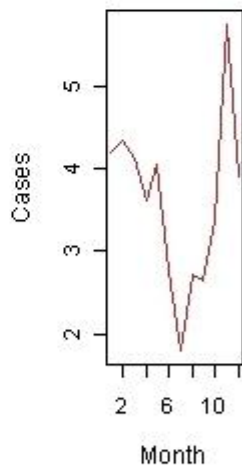**Namaacha**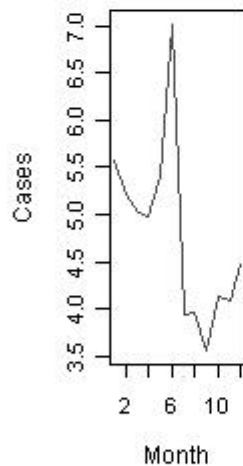

Supplement: MOESM7 [file 9541708]
